# Supplementary material for: Proper reference selection and re-referencing to mitigate bias in single pulse electrical stimulation data
Source: PubMed Central journal article supplement — bioRxiv. 2024 Oct 22:2024.10.21.619449. Preprint. [Version 1] doi: 10.1101/2024.10.21.619449 (PMC11526894; doi:10.1101/2024.10.21.619449), 2024-10-22
Supplement: NIHPP2024.10.21.619449V1-supplement-1.pdf [file NIHPP2024.10.21.619449V1-supplement-1.pdf]

## Supplementary Information

**Table S1. PEP Parameters across reference conditions.**

|                      | Positive Peak      |               |                  | Negative Peak      |               |                  | Response Duration  |               |                  |
|----------------------|--------------------|---------------|------------------|--------------------|---------------|------------------|--------------------|---------------|------------------|
|                      | Mean $\pm$ SD (ms) | Mode Size (%) | Entropy $\pm$ SE | Mean $\pm$ SD (ms) | Mode Size (%) | Entropy $\pm$ SE | Mean $\pm$ SD (ms) | Mode Size (%) | Entropy $\pm$ SE |
| <b>Subject 1</b>     |                    |               |                  |                    |               |                  |                    |               |                  |
| <b>Contam.</b>       | 54.2 $\pm$ 30.2    | 21.7          | 2.31 $\pm$ 0.11  | 50.7 $\pm$ 3.4     | 57.0          | 1.20 $\pm$ 0.08  |                    |               |                  |
| <b>Neutral</b>       | 54.7 $\pm$ 18.6    | 6.6           | 3.41 $\pm$ 0.09  | 51.0 $\pm$ 21.8    | 12.8          | 3.15 $\pm$ 0.11  |                    |               |                  |
| <b>Contam. CARLA</b> | 49.5 $\pm$ 16.9    | 5.8           | 3.44 $\pm$ 0.09  | 54.8 $\pm$ 19.3    | 5.7           | 3.63 $\pm$ 0.07  |                    |               |                  |
| <b>Neutral CARLA</b> | 50.4 $\pm$ 20.3    | 7.3           | 3.55 $\pm$ 0.10  | 53.4 $\pm$ 20.1    | 5.3           | 3.57 $\pm$ 0.09  |                    |               |                  |
| <b>Subject 2</b>     |                    |               |                  |                    |               |                  |                    |               |                  |
| <b>Contam.</b>       | 51.4 $\pm$ 10.9    | 69.8          | 1.55 $\pm$ 0.15  | 68.1 $\pm$ 13.4    | 77.0          | 1.13 $\pm$ 0.12  | 171 $\pm$ 44       | 60.3          | 1.05 $\pm$ 0.16  |
| <b>Neutral</b>       | 65.7 $\pm$ 17.1    | 41.7          | 2.08 $\pm$ 0.11  | 45.1 $\pm$ 19.9    | 41.0          | 1.93 $\pm$ 0.06  | 667 $\pm$ 341      | 29.4          | 1.53 $\pm$ 0.33  |
| <b>Contam. CARLA</b> | 49.4 $\pm$ 20.7    | 5.8           | 3.50 $\pm$ 0.11  | 44.4 $\pm$ 17.6    | 8.8           | 3.07 $\pm$ 0.11  | 273 $\pm$ 193      | 7.7           | 3.34 $\pm$ 0.11  |
| <b>Neutral CARLA</b> | 43.4 $\pm$ 19.2    | 6.8           | 3.20 $\pm$ 0.15  | 48.2 $\pm$ 16.1    | 9.8           | 2.93 $\pm$ 0.17  | 350 $\pm$ 283      | 14.5          | 2.77 $\pm$ 0.15  |
